# Supplementary material for: Restoration of Pulmonary Compliance after Laparoscopic Gynecologic Surgery Using a Recruitment Maneuver
Source: MDPI journal article supplement (doi:10.3390/jpm14050451), 2024-04-25
Supplement: s1 [file s1]

## SUPPLEMENTARY MATERIAL

**Table S1:** P-values (using Mann-Whitney U Test) for the stratification analysis data for the effect of BMI on DP (A). PIP (B). Pplat (C) and Compliance (D)

| A. DP Data |         |       |       |        |        |       |        |        |              |
|------------|---------|-------|-------|--------|--------|-------|--------|--------|--------------|
|            |         | T1    | T2    | T3     | T4     | T5    | T6     | T7     | T8           |
| MIN        | Average | 7.30  | 7.40  | 11.80  | 12.60  | 14.00 | 11.30  | 8.50   | 6.80         |
|            | STD     | 1.95  | 2.07  | 1.40   | 2.22   | 2.49  | 4.19   | 1.96   | 1.55         |
| MAX        | Average | 11.20 | 10.70 | 16.90  | 17.70  | 18.00 | 15.60  | 13.70  | 8.70         |
|            | STD     | 3.19  | 2.87  | 3.90   | 4.14   | 3.97  | 3.31   | 3.09   | 3.77         |
|            | p-value | 0.031 | 0.025 | 0.0022 | 0.0003 | 0.014 | 0.0036 | 0.0073 | <b>0.241</b> |

| B. PIP Data |         |        |        |       |        |        |       |        |             |
|-------------|---------|--------|--------|-------|--------|--------|-------|--------|-------------|
|             |         | T1     | T2     | T3    | T4     | T5     | T6    | T7     | T8          |
| MIN         | Average | 13.90  | 14.00  | 19.40 | 18.80  | 20.50  | 18.00 | 15.50  | 14.40       |
|             | STD     | 1.60   | 1.89   | 2.76  | 2.15   | 1.72   | 4.78  | 2.42   | 4.88        |
| MAX         | Average | 18.20  | 17.10  | 23.70 | 24.20  | 25.00  | 22.70 | 21.50  | 15.20       |
|             | STD     | 3.29   | 2.85   | 4.22  | 5.59   | 4.88   | 3.50  | 3.24   | 3.74        |
|             | p-value | 0.0022 | 0.0004 | 0.037 | 0.0017 | 0.0017 | 0.045 | 0.0003 | <b>0.24</b> |

| C. Pplat Data |         |        |        |       |       |       |       |       |              |
|---------------|---------|--------|--------|-------|-------|-------|-------|-------|--------------|
|               |         | T1     | T2     | T3    | T4    | T5    | T6    | T7    | T8           |
| MIN           | Average | 12.30  | 12.40  | 18.20 | 17.60 | 19.00 | 16.30 | 13.50 | 11.80        |
|               | STD     | 1.95   | 2.07   | 2.15  | 2.22  | 2.49  | 4.19  | 1.96  | 1.55         |
| MAX           | Average | 16.20  | 15.30  | 21.60 | 21.90 | 23.00 | 20.60 | 18.70 | 13.70        |
|               | STD     | 3.19   | 2.83   | 3.78  | 4.79  | 3.97  | 3.31  | 3.09  | 3.77         |
|               | p-value | 0.0006 | 0.0003 | 0.045 | 0.006 | 0.009 | 0.045 | 0.004 | <b>0.062</b> |

| D. ComplianceData |         |       |       |        |       |       |       |       |       |
|-------------------|---------|-------|-------|--------|-------|-------|-------|-------|-------|
|                   |         | T1    | T2    | T3     | T4    | T5    | T6    | T7    | T8    |
| MIN               | Average | 67.00 | 62.70 | 33.80  | 36.20 | 33.20 | 43.50 | 54.50 | 77.40 |
|                   | STD     | 10.68 | 10.89 | 5.75   | 6.80  | 4.66  | 5.15  | 11.74 | 9.52  |
| MAX               | Average | 47.20 | 46.80 | 27.00  | 26.20 | 27.00 | 31.50 | 37.80 | 65.60 |
|                   | STD     | 11.81 | 12.80 | 4.94   | 7.93  | 6.20  | 6.13  | 8.02  | 15.20 |
|                   | p-value | 0.01  | 0.01  | 0.0046 | 0.009 | 0.025 | 0.03  | 0.021 | 0.065 |

**Table S2:** P-values (using Mann-Whitney U Test) for the stratification analysis data for the effect of initial Compliance (CdynT1) on Pplat (A). PIP (B). DP (C) and Compliance (D)

| A. Pplat Data |         |        |        |         |        |       |       |       |       |
|---------------|---------|--------|--------|---------|--------|-------|-------|-------|-------|
|               |         | T1     | T2     | T3      | T4     | T5    | T6    | T7    | T8    |
| MIN           | Average | 16.50  | 16.10  | 23.10   | 22.70  | 22.50 | 19.40 | 17.50 | 14.00 |
|               | STD     | 2.46   | 2.56   | 2.64    | 3.86   | 4.38  | 3.44  | 2.84  | 3.59  |
| MAX           | Average | 11.60  | 12.00  | 17.60   | 17.70  | 19.40 | 17.20 | 14.00 | 12.00 |
|               | STD     | 1.17   | 0.82   | 2.12    | 1.64   | 3.24  | 4.59  | 3.77  | 2.05  |
|               | p-value | 0.0018 | 0.0018 | 0.00029 | 0.0003 | 0.054 | 0.795 | 0.089 | 0.168 |

| B. PIP Data |         |       |       |       |       |       |       |       |       |
|-------------|---------|-------|-------|-------|-------|-------|-------|-------|-------|
|             |         | T1    | T2    | T3    | T4    | T5    | T6    | T7    | T8    |
| MIN         | Average | 17.70 | 17.60 | 25.40 | 25.00 | 24.50 | 21.10 | 20.20 | 15.10 |
|             | STD     | 2.63  | 2.50  | 2.88  | 4.62  | 4.74  | 3.63  | 2.94  | 3.63  |
| MAX         | Average | 13.30 | 13.60 | 18.90 | 19.60 | 21.30 | 19.20 | 16.10 | 14.60 |

|  |                |        |        |        |       |             |               |               |              |
|--|----------------|--------|--------|--------|-------|-------------|---------------|---------------|--------------|
|  | <b>STD</b>     | 1.16   | 0.84   | 2.13   | 2.55  | 3.53        | 5.61          | 4.33          | 4.88         |
|  | <b>p-value</b> | 0.0013 | 0.0013 | 0.0002 | 0.009 | <b>0.09</b> | <b>0.2161</b> | <b>0.0531</b> | <b>0.734</b> |

| <b>C. DP Data</b> |                |           |           |           |           |               |              |               |              |
|-------------------|----------------|-----------|-----------|-----------|-----------|---------------|--------------|---------------|--------------|
|                   |                | <b>T1</b> | <b>T2</b> | <b>T3</b> | <b>T4</b> | <b>T5</b>     | <b>T6</b>    | <b>T7</b>     | <b>T8</b>    |
| <b>MIN</b>        | <b>Average</b> | 11.50     | 11.10     | 18.10     | 17.70     | 17.50         | 14.40        | 12.50         | 9.10         |
|                   | <b>STD</b>     | 2.46      | 2.56      | 2.64      | 3.86      | 4.38          | 3.44         | 2.84          | 3.54         |
| <b>MAX</b>        | <b>Average</b> | 6.60      | 7.00      | 13.30     | 12.70     | 14.40         | 12.20        | 9.00          | 7.00         |
|                   | <b>STD</b>     | 1.17      | 0.82      | 1.49      | 1.64      | 3.24          | 4.59         | 3.77          | 2.05         |
|                   | <b>p-value</b> | 0.0001    | 0.0006    | 0.001     | 0.0016    | <b>0.4219</b> | <b>0.125</b> | <b>0.0512</b> | <b>0.101</b> |

| <b>D. Compliance Data</b> |                |           |           |           |           |           |             |           |           |
|---------------------------|----------------|-----------|-----------|-----------|-----------|-----------|-------------|-----------|-----------|
|                           |                | <b>T1</b> | <b>T2</b> | <b>T3</b> | <b>T4</b> | <b>T5</b> | <b>T6</b>   | <b>T7</b> | <b>T8</b> |
| <b>MIN</b>                | <b>Average</b> | 42.10     | 43.70     | 25.00     | 25.00     | 25.60     | 34.10       | 36.80     | 57.50     |
|                           | <b>STD</b>     | 5.99      | 12.37     | 4.47      | 5.33      | 6.52      | 8.50        | 7.51      | 8.17      |
| <b>MAX</b>                | <b>Average</b> | 71.60     | 67.90     | 34.60     | 34.90     | 34.50     | 43.50       | 59.60     | 81.90     |
|                           | <b>STD</b>     | 2.95      | 3.67      | 5.99      | 7.81      | 5.04      | 12.70       | 12.68     | 4.58      |
|                           | <b>p-value</b> | 0.0001    | 0.0004    | 0.0039    | 0.005     | 0.011     | <b>0.25</b> | 0.0035    | 0.0002    |

**Table S3:** P-values (using Mann-Whitney U Test) for the stratification analysis data for the effect of initial DP (DP\_T1) on DP (A). PIP (B). Pplat (C) and Compliance (D).

| <b>A. DP Data</b> |  |           |           |           |           |           |           |           |           |
|-------------------|--|-----------|-----------|-----------|-----------|-----------|-----------|-----------|-----------|
|                   |  | <b>T1</b> | <b>T2</b> | <b>T3</b> | <b>T4</b> | <b>T5</b> | <b>T6</b> | <b>T7</b> | <b>T8</b> |

|            |                |         |         |         |         |         |         |         |         |
|------------|----------------|---------|---------|---------|---------|---------|---------|---------|---------|
| <b>MIN</b> | <b>Average</b> | 6.10    | 6.70    | 12.70   | 11.50   | 13.30   | 11.20   | 8.00    | 6.80    |
|            | <b>STD</b>     | 0.74    | 0.67    | 1.25    | 2.37    | 2.67    | 4.42    | 1.94    | 2.10    |
| <b>MAX</b> | <b>Average</b> | 12.20   | 11.10   | 17.80   | 16.90   | 17.00   | 14.20   | 12.90   | 9.20    |
|            | <b>STD</b>     | 2.35    | 2.56    | 3.16    | 4.75    | 4.59    | 3.33    | 2.73    | 3.52    |
|            | <b>p-value</b> | 0.00004 | 0.00075 | 0.00147 | 0.01373 | 0.06629 | 0.13806 | 0.00174 | 0.11286 |

| <b>B. PIP Data</b> |                |           |           |           |           |           |           |           |           |
|--------------------|----------------|-----------|-----------|-----------|-----------|-----------|-----------|-----------|-----------|
|                    |                | <b>T1</b> | <b>T2</b> | <b>T3</b> | <b>T4</b> | <b>T5</b> | <b>T6</b> | <b>T7</b> | <b>T8</b> |
| <b>MIN</b>         | <b>Average</b> | 12.80     | 13.30     | 18.90     | 18.30     | 20.00     | 17.70     | 14.90     | 14.40     |
|                    | <b>STD</b>     | 1.14      | 0.82      | 1.60      | 3.20      | 1.70      | 5.21      | 2.02      | 4.99      |
| <b>MAX</b>         | <b>Average</b> | 18.50     | 17.50     | 25.00     | 24.00     | 24.10     | 20.80     | 20.10     | 15.10     |
|                    | <b>STD</b>     | 2.59      | 2.64      | 3.59      | 5.60      | 4.95      | 3.49      | 2.92      | 3.63      |
|                    | <b>p-value</b> | 0.000192  | 0.001359  | 0.001188  | 0.026376  | 0.043421  | 0.192     | 0.0010    | 0.7913    |

| <b>C. Pplat Data</b> |                |           |           |           |           |                |           |           |           |
|----------------------|----------------|-----------|-----------|-----------|-----------|----------------|-----------|-----------|-----------|
|                      |                | <b>T1</b> | <b>T2</b> | <b>T3</b> | <b>T4</b> | <b>T5</b>      | <b>T6</b> | <b>T7</b> | <b>T8</b> |
| <b>MIN</b>           | <b>Average</b> | 11.10     | 11.70     | 17.70     | 16.50     | 18.30          | 16.20     | 13.00     | 11.80     |
|                      | <b>STD</b>     | 0.74      | 0.67      | 1.25      | 2.37      | 2.67           | 4.42      | 1.94      | 2.10      |
| <b>MAX</b>           | <b>Average</b> | 17.20     | 16.10     | 22.80     | 21.90     | 22.00          | 19.20     | 17.90     | 14.10     |
|                      | <b>STD</b>     | 2.35      | 2.56      | 3.16      | 4.75      | 4.59           | 3.33      | 2.73      | 3.57      |
|                      | <b>p-value</b> | 0.00018   | 0.0002    | 0.0007    | 0.01073   | <b>0.04629</b> | 0.23806   | 0.0022    | 0.23020   |

| <b>D. ComplianceData</b> |                |           |           |           |           |           |           |           |           |
|--------------------------|----------------|-----------|-----------|-----------|-----------|-----------|-----------|-----------|-----------|
|                          |                | <b>T1</b> | <b>T2</b> | <b>T3</b> | <b>T4</b> | <b>T5</b> | <b>T6</b> | <b>T7</b> | <b>T8</b> |
| <b>MIN</b>               | <b>Average</b> | 68.90     | 65.30     | 34.80     | 37.90     | 34.10     | 45.70     | 59.10     | 78.90     |
|                          | <b>STD</b>     | 6.87      | 7.57      | 5.81      | 8.16      | 4.75      | 12.25     | 12.63     | 6.77      |

|            |                |         |         |          |          |       |          |        |        |
|------------|----------------|---------|---------|----------|----------|-------|----------|--------|--------|
| <b>MAX</b> | <b>Average</b> | 43.10   | 44.90   | 25.80    | 27.10    | 26.20 | 34.30    | 35.40  | 58.30  |
|            | <b>STD</b>     | 6.59    | 12.55   | 5.47     | 8.24     | 7.11  | 8.45     | 6.65   | 9.39   |
|            | <b>p-value</b> | 0.00018 | 0.00290 | 0.008085 | 0.040898 | 0.009 | 0.027100 | 0.0018 | 0.0021 |

**Table S4:** P-values (using Mann-Whitney U Test) for the stratification analysis data for the effect of initial Pplat (Pplat\_T1) on Pplat (A). PIP (B). DP (C) and Compliance (D).

| <b>A. Pplat Data</b> |                |           |           |           |           |           |                 |           |              |
|----------------------|----------------|-----------|-----------|-----------|-----------|-----------|-----------------|-----------|--------------|
|                      |                | <b>T1</b> | <b>T2</b> | <b>T3</b> | <b>T4</b> | <b>T5</b> | <b>T6</b>       | <b>T7</b> | <b>T8</b>    |
| <b>MIN</b>           | <b>Average</b> | 11.10     | 11.70     | 17.70     | 16.50     | 18.30     | 16.20           | 13.00     | 11.80        |
|                      | <b>STD</b>     | 0.74      | 0.67      | 1.25      | 2.37      | 2.67      | 4.42            | 1.94      | 2.10         |
| <b>MAX</b>           | <b>Average</b> | 17.20     | 16.40     | 22.60     | 21.70     | 22.40     | 19.80           | 17.90     | 14.40        |
|                      | <b>STD</b>     | 2.35      | 2.59      | 3.34      | 4.88      | 4.17      | 3.01            | 2.73      | 3.31         |
|                      | <b>p-value</b> | 0.0002    | 0.0003    | 0.002593  | 0.031     | 0.014     | <b>0.074090</b> | 0.0033    | <b>0.065</b> |

| <b>B. PIP Data</b> |                |           |           |           |           |           |               |           |              |
|--------------------|----------------|-----------|-----------|-----------|-----------|-----------|---------------|-----------|--------------|
|                    |                | <b>T1</b> | <b>T2</b> | <b>T3</b> | <b>T4</b> | <b>T5</b> | <b>T6</b>     | <b>T7</b> | <b>T8</b>    |
| <b>MIN</b>         | <b>Average</b> | 12.80     | 13.30     | 18.90     | 18.30     | 20.00     | 17.70         | 14.90     | 14.40        |
|                    | <b>STD</b>     | 1.14      | 0.82      | 1.60      | 3.20      | 1.70      | 5.21          | 2.02      | 4.99         |
| <b>MAX</b>         | <b>Average</b> | 18.50     | 17.80     | 24.80     | 23.70     | 24.70     | 21.50         | 20.30     | 16.00        |
|                    | <b>STD</b>     | 2.59      | 2.62      | 3.77      | 5.79      | 4.16      | 3.10          | 2.67      | 3.33         |
|                    | <b>p-value</b> | 0.00018   | 0.0092    | 0.0018    | 0.0423    | 0.007032  | <b>0.1212</b> | 0.003     | <b>0.245</b> |

| <b>C. DP Data</b> |                |           |           |           |           |           |           |           |           |
|-------------------|----------------|-----------|-----------|-----------|-----------|-----------|-----------|-----------|-----------|
|                   |                | <b>T1</b> | <b>T2</b> | <b>T3</b> | <b>T4</b> | <b>T5</b> | <b>T6</b> | <b>T7</b> | <b>T8</b> |
| <b>MIN</b>        | <b>Average</b> | 6.10      | 6.70      | 12.70     | 11.50     | 13.30     | 11.20     | 8.00      | 6.80      |
|                   | <b>STD</b>     | 0.74      | 0.67      | 1.25      | 2.37      | 2.67      | 4.42      | 1.94      | 2.10      |
| <b>MAX</b>        | <b>Average</b> | 12.20     | 11.40     | 17.60     | 16.70     | 17.40     | 14.80     | 12.90     | 9.50      |
|                   | <b>STD</b>     | 2.35      | 2.59      | 3.34      | 4.88      | 4.17      | 3.01      | 2.73      | 3.24      |

|  |                |          |         |        |        |       |               |         |              |
|--|----------------|----------|---------|--------|--------|-------|---------------|---------|--------------|
|  | <b>p-value</b> | 0.000189 | 0.00058 | 0.0089 | 0.0028 | 0.031 | <b>0.1030</b> | 0.00035 | <b>0.058</b> |
|--|----------------|----------|---------|--------|--------|-------|---------------|---------|--------------|

| <b>D. ComplianceData</b> |                |              |              |              |              |              |              |              |              |
|--------------------------|----------------|--------------|--------------|--------------|--------------|--------------|--------------|--------------|--------------|
|                          |                | <b>T1</b>    | <b>T2</b>    | <b>T3</b>    | <b>T4</b>    | <b>T5</b>    | <b>T6</b>    | <b>T7</b>    | <b>T8</b>    |
| <b>MIN</b>               | <b>Average</b> | <b>68.90</b> | <b>65.30</b> | <b>34.80</b> | <b>37.90</b> | <b>34.10</b> | <b>45.70</b> | <b>59.10</b> | <b>78.90</b> |
|                          | <b>STD</b>     | <b>6.87</b>  | <b>7.57</b>  | <b>5.81</b>  | <b>8.16</b>  | <b>4.75</b>  | <b>12.25</b> | <b>12.63</b> | <b>6.77</b>  |
| <b>MAX</b>               | <b>Average</b> | <b>45.70</b> | <b>46.30</b> | <b>26.20</b> | <b>28.60</b> | <b>25.50</b> | <b>33.20</b> | <b>36.00</b> | <b>59.90</b> |
|                          | <b>STD</b>     | <b>9.65</b>  | <b>12.96</b> | <b>5.39</b>  | <b>8.95</b>  | <b>6.10</b>  | <b>8.04</b>  | <b>7.53</b>  | <b>10.10</b> |
|                          | <b>p-value</b> | 0.000439     | 0.00727      | 0.0127       | 0.0414       | 0.0044       | 0.001        | 0.0092       | 0.0008       |

**Table S5:** P-values (using Mann-Whitney U Test) for the initial dataset of 31 patients.

| Demographics |         |          |       |       |                     |               |                  |                   |                     |      |            |         |         |        |      |  |
|--------------|---------|----------|-------|-------|---------------------|---------------|------------------|-------------------|---------------------|------|------------|---------|---------|--------|------|--|
| A ge         | Hei ght | We igh t | IB W  | B M I | Total Cryst alloids | To tal EP H E | Pro pofo l (mg ) | Surgery duratio n | Anesthesi aduration |      |            |         |         |        |      |  |
| 0.98         | 0.45    | 0.94     | 0.36  | 0.68  | 0.09                | 0.64          | 0.53             | 0.58              | 0.45                |      |            |         |         |        |      |  |
| T1           |         |          |       |       |                     |               |                  |                   |                     |      |            |         |         |        |      |  |
| M A P        | HR      | Sp O2    | R a w | PI P  | Pplat               | PE EP         | DP               | VT                | Cdyn                | R R  | PaO2 /FiO2 | Et CO 2 | Pa CO 2 | H C O3 | p H  |  |
| 0.66         | 0.62    | 0.06     | 0.75  | 0.64  | 0.57                | 1.00          | 0.57             | 0.35              | 0.37                | 0.08 | 0.0        | 0.98    | 0.77    | 0.07   | 0.07 |  |
| T2           |         |          |       |       |                     |               |                  |                   |                     |      |            |         |         |        |      |  |
| M A P        | HR      | Sp O2    | R a w | PI P  | Pplat               | PE EP         | DP               | VT                | Cdyn                | R R  | PaO2 /FiO2 | Et CO 2 | Pa CO 2 | H C O3 | p H  |  |
| 0.27         | 0.29    | 0.36     | 0.18  | 0.15  | 0.41                | 1.00          | 0.41             | 0.35              | 0.63                | 0.09 | 0.98       | 0.88    | 0.92    | 0.06   | 0.12 |  |
| T3           |         |          |       |       |                     |               |                  |                   |                     |      |            |         |         |        |      |  |
| M A P        | HR      | Sp O2    | R a w | PI P  | Pplat               | Pe ep         | DP               | VT                | Cdyn                | R R  | PaO2 /FiO2 | Et CO 2 | Pa CO 2 | H C O3 | p H  |  |

|                      |           |                  |                      |                 |              |                  |            |           |             |                |                       |                        |                        |                       |                |
|----------------------|-----------|------------------|----------------------|-----------------|--------------|------------------|------------|-----------|-------------|----------------|-----------------------|------------------------|------------------------|-----------------------|----------------|
| 0.59                 | 0.25      | 0.41             | 0.89                 | 0.92            | 0.92         | 1.00             | 0.63       | 0.35      | 0.53        | 0.43           | 0.11                  | 0.81                   | 0.55                   | 0.59                  | 0.25           |
| T4                   |           |                  |                      |                 |              |                  |            |           |             |                |                       |                        |                        |                       |                |
| <b>M<br/>A<br/>P</b> | <b>HR</b> | <b>Sp<br/>O2</b> | <b>R<br/>a<br/>w</b> | <b>PI<br/>P</b> | <b>Pplat</b> | <b>PE<br/>EP</b> | <b>DP</b>  | <b>VT</b> | <b>Cdyn</b> | <b>R<br/>R</b> | <b>PaO2<br/>/FiO2</b> | <b>Et<br/>CO<br/>2</b> | <b>Pa<br/>CO<br/>2</b> | <b>H<br/>C<br/>O3</b> | <b>p<br/>H</b> |
| 0.94                 | 0.34      | 0.30             | 0.81                 | 0.94            | 0.89         | 1.00             | 0.89       | 0.48      | 0.66        | 0.52           | 0.55                  | 0.55                   | 0.89                   | 0.07                  | 0.25           |
| T5                   |           |                  |                      |                 |              |                  |            |           |             |                |                       |                        |                        |                       |                |
| <b>M<br/>A<br/>P</b> | <b>HR</b> | <b>Sp<br/>O2</b> | <b>R<br/>a<br/>w</b> | <b>PI<br/>P</b> | <b>Pplat</b> | <b>PE<br/>EP</b> | <b>DP</b>  | <b>VT</b> | <b>Cdyn</b> | <b>R<br/>R</b> | <b>PaO2<br/>/FiO2</b> | <b>Et<br/>CO<br/>2</b> | <b>Pa<br/>CO<br/>2</b> | <b>H<br/>C<br/>O3</b> | <b>p<br/>H</b> |
| 0.69                 | 0.33      | 0.06             | 1.00                 | 0.90            | 0.58         | 1.00             | 0.58       | 0.09      | 0.75        | 0.31           | 0.25                  | 0.06                   | 0.38                   | 0.51                  | 0.59           |
| T6                   |           |                  |                      |                 |              |                  |            |           |             |                |                       |                        |                        |                       |                |
| <b>M<br/>A<br/>P</b> | <b>HR</b> | <b>Sp<br/>O2</b> | <b>R<br/>a<br/>w</b> | <b>PI<br/>P</b> | <b>Pplat</b> | <b>PE<br/>EP</b> | <b>DP</b>  | <b>VT</b> | <b>Cdyn</b> | <b>R<br/>R</b> | <b>PaO2<br/>/FiO2</b> | <b>Et<br/>CO<br/>2</b> | <b>Pa<br/>CO<br/>2</b> | <b>H<br/>C<br/>O3</b> | <b>p<br/>H</b> |
| 0.50                 | 0.89      | 0.40             | 0.68                 | 0.51            | 0.54         | 1.00             | 0.54       | 0.23      | 0.42        | 0.61           | 0.24                  | 0.20                   | 0.25                   | 0.98                  | 0.95           |
| T7                   |           |                  |                      |                 |              |                  |            |           |             |                |                       |                        |                        |                       |                |
| <b>M<br/>A<br/>P</b> | <b>HR</b> | <b>Sp<br/>O2</b> | <b>R<br/>a<br/>w</b> | <b>PI<br/>P</b> | <b>Pplat</b> | <b>Pe<br/>ep</b> | <b>DP</b>  | <b>VT</b> | <b>Cdyn</b> | <b>R<br/>R</b> | <b>PaO2<br/>/FiO2</b> | <b>Et<br/>CO<br/>2</b> | <b>Pa<br/>CO<br/>2</b> | <b>H<br/>C<br/>O3</b> | <b>p<br/>H</b> |
| 0.95                 | 0.21      | 0.16             | 0.76                 | 0.47            | 1.00         | 1.00             | 1.00       | 0.23      | 0.61        | 0.37           | 0.37                  | 0.52                   | 0.37                   | 0.31                  | 0.62           |
| T8                   |           |                  |                      |                 |              |                  |            |           |             |                |                       |                        |                        |                       |                |
| <b>M<br/>A<br/>P</b> | <b>HR</b> | <b>Sp<br/>O2</b> | <b>R<br/>a<br/>w</b> | <b>PI<br/>P</b> | <b>Pplat</b> | <b>PE<br/>EP</b> | <b>DP)</b> | <b>VT</b> | <b>Cdyn</b> | <b>R<br/>R</b> | <b>PaO2<br/>/FiO2</b> | <b>Et<br/>CO<br/>2</b> | <b>Pa<br/>CO<br/>2</b> | <b>H<br/>C<br/>O3</b> | <b>p<br/>H</b> |
| 0.17                 | 0.39      | 0.06             | 0.98                 | 0.53            | 0.55         | 1.00             | 0.51       | 0.53      | 0.45        | 0.06           | 0.31                  | 0.09                   | 0.48                   | 0.18                  | 0.27           |
